# Supplementary material for: Micropallet arrays with poly(ethylene glycol) walls
Source: Royal Society of Chemistry journal article supplement (doi:10.1039/b800286j), 2008-01-01
Supplement: b800286j.pdf [file b800286j.pdf]

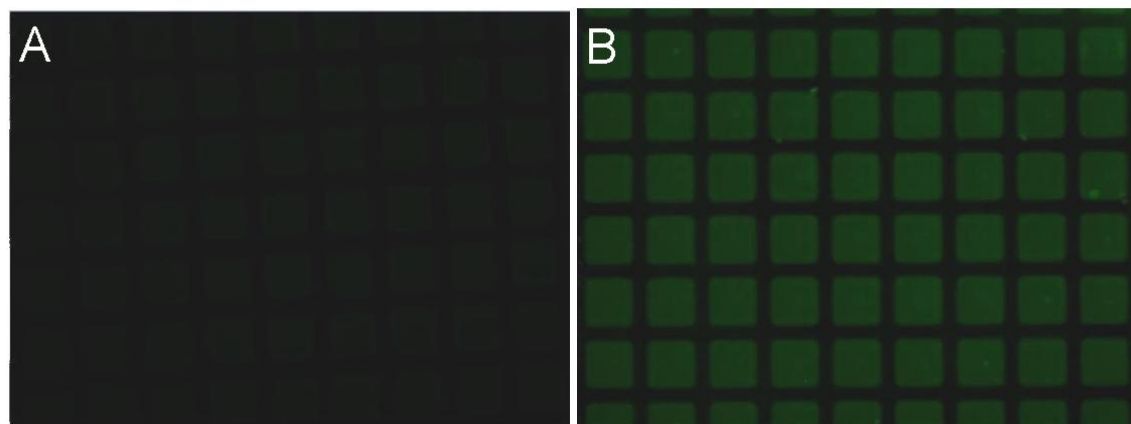

**Fig. S1.** Adsorption of collagen to pallet arrays. A) Fluorescence image of a pallet array with PEG walls without collagen adsorption. B) Fluorescence image of pallet array with PEG walls after collagen adsorption (1 mg/mL collagen IV-Oregon Green 488 (Invitrogen), 20 minutes). The array was washed 3X after incubation. The images were captured at the same setting (contrast, exposure).

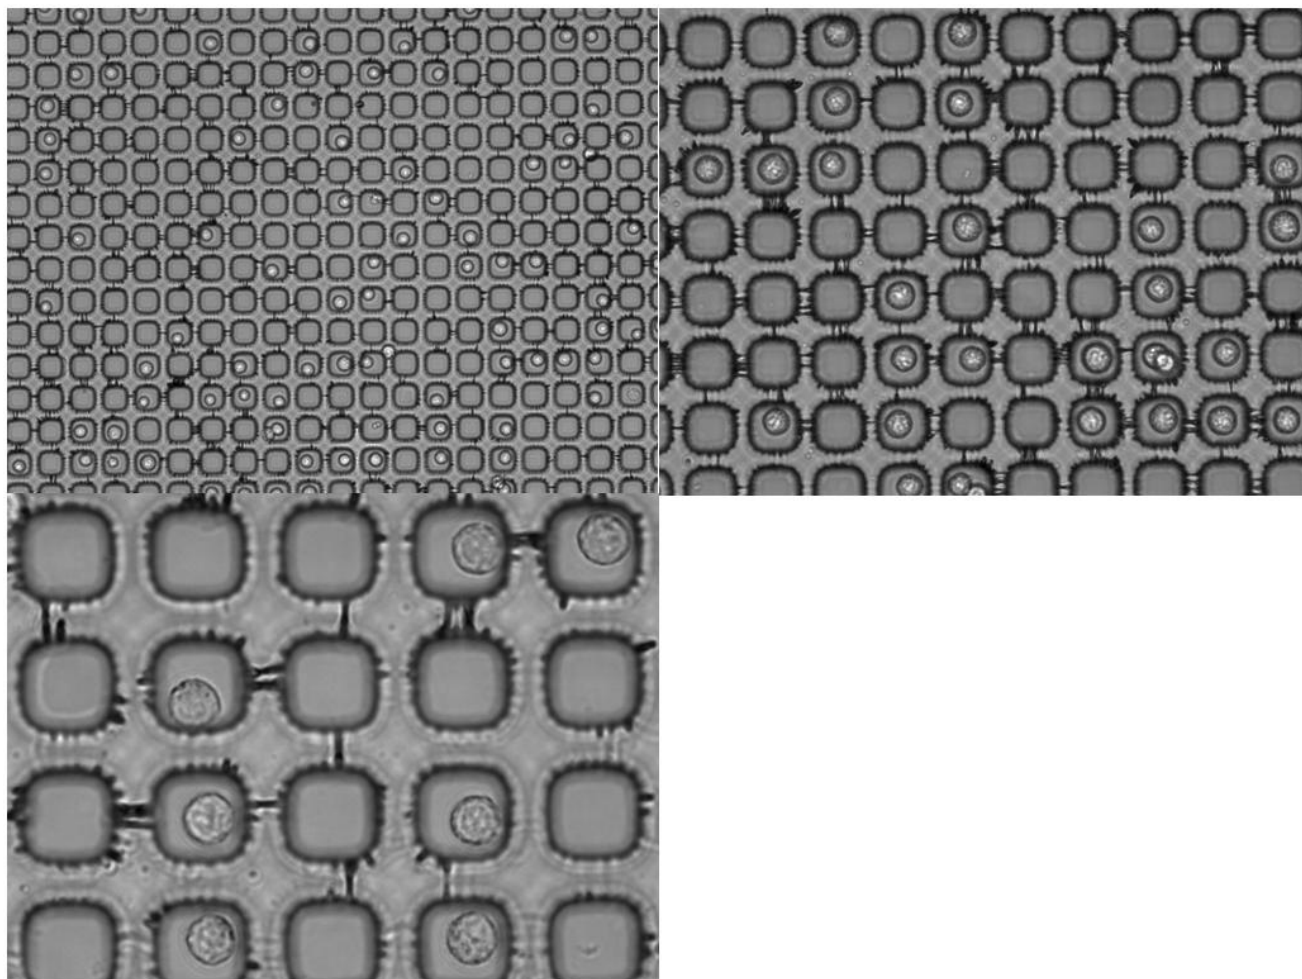

**Fig. S2.** Arrays with 30 X 30  $\mu\text{m}$  pallets (30  $\mu\text{m}$  height, 12  $\mu\text{m}$  inter-pallet spacing) were fabricated with PEG walls. The array was then coated with collagen. HeLa cells were incubated on the array for 1 hour and then the array was washed to dislodge cells that had not attached. Most pallets on the array possessed either 0 or 1 HeLa cell. Different magnifications of the same array are shown.
